# Supplementary material for: Comparative Genome Analysis and Global Phylogeny of the Toxin Variant Clostridium difficile PCR Ribotype 017 Reveals the Evolution of Two Independent Sublineages
Source: PubMed Central journal article supplement (PMC5328454; doi:10.1128/jcm.01296-16), 2017-02-22
Supplement: JCM.01296-16_zjm999095388s1.pdf [file JCM.01296-16_zjm999095388s1.pdf]

Supplementary Information 1: Details of 277 *C. difficile* study isolates and their genotypic characteristics. Non-human isolates are indicated by strain names followed by “C” (canine), “B” (bovine), “E” (equine) and “HW” (hospital ward).

| Sub-Lineage | Strain Name        | Location        | Isolation Year | Haplotype | No. of SNPs | Insertion | Deletion | Rifampicin resistance |             |             | Fluoroquinolone resistance |             |             |
|-------------|--------------------|-----------------|----------------|-----------|-------------|-----------|----------|-----------------------|-------------|-------------|----------------------------|-------------|-------------|
|             |                    |                 |                |           |             |           |          | 34,687                | 34,697      | 34,747      | 112,752                    | 113,641     | 113,642     |
|             |                    |                 |                |           |             |           |          | <i>rpoB</i>           | <i>rpoB</i> | <i>rpoB</i> | <i>gyrA</i>                | <i>gyrB</i> | <i>gyrB</i> |
|             |                    |                 |                |           |             |           |          | R505K                 | H502N       | S485F       | T82I                       | V426D       | V426I       |
| 1           | M04-34             | Dublin, Ireland | 2004           | 1         | 0           |           |          |                       |             |             |                            |             |             |
| 1           | M04-21             | Dublin, Ireland | 2004           | 1         | 0           |           |          |                       |             |             |                            |             |             |
| 1           | M04-30             | Dublin, Ireland | 2004           | 1         | 0           |           |          |                       |             |             |                            |             |             |
| 1           | M04-40             | Dublin, Ireland | 2004           | 1         | 0           |           |          |                       |             |             |                            |             |             |
| 1           | M04-50             | Dublin, Ireland | 2004           | 1         | 0           |           |          |                       |             |             |                            |             |             |
| 1           | M05-213            | Dublin, Ireland | 2005           | 1         | 0           |           |          |                       |             |             |                            |             |             |
| 1           | M05-195            | Dublin, Ireland | 2005           | 1         | 0           |           |          |                       |             |             |                            |             |             |
| 1           | M05-214            | Dublin, Ireland | 2005           | 1         | 0           |           |          |                       |             |             |                            |             |             |
| 1           | M04-9              | Dublin, Ireland | 2004           | 2         | 2           |           |          |                       |             |             |                            |             |             |
| 1           | M08-127            | Dublin, Ireland | 2008           | 3         | 3           |           |          |                       |             |             |                            |             |             |
| 1           | M08-150            | Dublin, Ireland | 2008           | 3         | 3           |           |          |                       |             |             |                            |             |             |
| 1           | IE 1104            | Dublin, Ireland | 2009           | 3         | 3           |           |          |                       |             |             |                            |             |             |
| 1           | SV04-54            | Dublin, Ireland | 2005           | 4         | 5           |           |          |                       |             |             |                            |             |             |
| 1           | S3                 | Dublin, Ireland | 2006           | 4         | 5           |           |          |                       |             |             |                            |             |             |
| 1           | MOH849             | Ontario, Canada | 2003           | 5         | 6           |           |          |                       |             | ✓           |                            |             |             |
| 1           | CD257              | Ontario, Canada | 2003           | 5         | 6           |           |          |                       |             | ✓           |                            |             |             |
| 1           | CD334              | Ontario, Canada | 2003           | 5         | 6           |           |          |                       |             | ✓           |                            |             |             |
| 1           | CD459              | Ontario, Canada | 2003           | 5         | 6           |           |          |                       |             | ✓           |                            |             |             |
| 1           | S- 017.8           | Dublin, Ireland | 2000           | 6         | 7           |           |          |                       |             |             |                            |             |             |
| 1           | S- 017.9           | Dublin, Ireland | 2000           | 6         | 7           |           |          |                       |             |             |                            |             |             |
| 1           | S- 017.10          | Dublin, Ireland | 2000           | 6         | 7           |           |          |                       |             |             |                            |             |             |
| 1           | MOH82              | Ontario, Canada | 2003           | 7         | 8           |           |          |                       |             | ✓           |                            |             |             |
| 1           | CD656 <sup>B</sup> | Ontario, Canada | 2004           | 7         | 8           |           |          |                       |             | ✓           |                            |             |             |
| 1           | CD657 <sup>B</sup> | Ontario, Canada | 2004           | 7         | 8           |           |          |                       |             | ✓           |                            |             |             |
| 1           | S- 017.5           | Carlisle, UK    | 1994           | 8         | 9           | ✓         |          |                       |             |             | ✓                          |             |             |

Resistance inferred  
Position  
Gene  
\*Amino acid change

|   |                    |                   |      |    |    |   |   |   |   |  |   |   |   |
|---|--------------------|-------------------|------|----|----|---|---|---|---|--|---|---|---|
| 1 | GAI 95601          | Japan             | 1995 | 8  | 9  |   |   |   |   |  |   | ✓ |   |
| 1 | S- 017.13          | Japan             | 1999 | 8  | 9  |   |   |   |   |  |   | ✓ |   |
| 1 | B-33               | London, UK        | 2011 | 8  | 9  |   |   |   |   |  |   | ✓ |   |
| 1 | M04-106            | Dublin, Ireland   | 2005 | 9  | 10 | ✓ |   |   |   |  |   |   |   |
| 1 | M05-185            | Dublin, Ireland   | 2005 | 9  | 10 |   |   |   |   |  |   |   |   |
| 1 | 7081082            | The Netherlands   | 2007 | 10 | 10 | ✓ |   |   |   |  |   | ✓ |   |
| 1 | 8083571            | The Netherlands   | 2008 | 10 | 10 |   |   |   |   |  |   | ✓ |   |
| 1 | MRL 1135           | North Dakota, USA | 2007 | 11 | 10 |   | ✓ |   |   |  |   | ✓ |   |
| 1 | UHL-24             | London, UK        | 2013 | 12 | 11 |   |   |   |   |  |   | ✓ |   |
| 1 | MRL 981            | California, USA   | 2007 | 13 | 11 |   | ✓ |   |   |  |   | ✓ | ✓ |
| 1 | S- 017.12          | Japan             | 1999 | 14 | 11 |   |   |   |   |  |   | ✓ |   |
| 1 | 11-383             | Korea             | 2011 | 15 | 11 | ✓ | ✓ |   |   |  | ✓ | ✓ |   |
| 1 | PT 1307            | Portugal          | 2009 | 16 | 13 | ✓ | ✓ | ✓ | ✓ |  | ✓ | ✓ |   |
| 1 | S- 017.22          | Poole, UK         | 2003 | 17 | 13 |   |   |   |   |  |   | ✓ |   |
| 1 | S- 017.23          | Poole, UK         | 2003 | 17 | 13 |   |   |   |   |  |   | ✓ |   |
| 1 | S- 017.24          | Poole, UK         | 2003 | 17 | 13 |   |   |   |   |  |   | ✓ |   |
| 1 | S- 017.25          | Poole, UK         | 2003 | 17 | 13 |   |   |   |   |  |   | ✓ |   |
| 1 | MRL 529            | Michigan, USA     | 2007 | 18 | 13 |   |   |   |   |  | ✓ | ✓ |   |
| 1 | SV04-9             | Dublin, Ireland   | 2004 | 19 | 14 | ✓ |   |   |   |  |   |   |   |
| 1 | SV04-17            | Dublin, Ireland   | 2004 | 19 | 14 | ✓ |   |   |   |  |   |   |   |
| 1 | SV04-29            | Dublin, Ireland   | 2004 | 19 | 14 | ✓ |   |   |   |  |   |   |   |
| 1 | MRL 532            | Michigan, USA     | 2007 | 20 | 15 | ✓ | ✓ |   |   |  | ✓ | ✓ |   |
| 1 | CD552 <sup>E</sup> | Ontario, Canada   | 2002 | 21 | 15 |   |   |   |   |  | ✓ | ✓ |   |
| 1 | CD577 <sup>E</sup> | Ontario, Canada   | 2003 | 21 | 15 |   |   |   |   |  | ✓ | ✓ |   |
| 1 | CD409              | Ontario, Canada   | 2003 | 21 | 15 |   |   |   |   |  | ✓ | ✓ |   |
| 1 | CD159              | Ontario, Canada   | 2003 | 21 | 15 |   |   |   |   |  | ✓ | ✓ |   |
| 1 | CD210              | Ontario, Canada   | 2003 | 21 | 15 |   |   |   |   |  | ✓ | ✓ |   |
| 1 | CD160              | Ontario, Canada   | 2003 | 21 | 15 |   |   |   |   |  | ✓ | ✓ |   |
| 1 | CD425              | Ontario, Canada   | 2003 | 21 | 15 |   |   |   |   |  | ✓ | ✓ |   |
| 1 | CD345              | Ontario, Canada   | 2003 | 21 | 15 |   | ✓ |   |   |  | ✓ | ✓ |   |
| 1 | CD538 <sup>E</sup> | Ontario, Canada   | 2003 | 21 | 15 |   |   |   |   |  | ✓ | ✓ |   |
| 1 | CD562              | Ontario, Canada   | 2004 | 21 | 15 |   |   |   |   |  | ✓ | ✓ |   |
| 1 | CD744 <sup>B</sup> | Ontario, Canada   | 2004 | 21 | 15 |   |   |   |   |  | ✓ | ✓ |   |

|   |                    |                 |      |    |    |   |   |   |   |  |   |   |  |
|---|--------------------|-----------------|------|----|----|---|---|---|---|--|---|---|--|
| 1 | CD472 <sup>B</sup> | Ontario, Canada | 2004 | 21 | 15 |   | ✓ |   |   |  | ✓ | ✓ |  |
| 1 | CD748 <sup>B</sup> | Ontario, Canada | 2004 | 21 | 15 |   |   |   |   |  | ✓ | ✓ |  |
| 1 | CD754 <sup>B</sup> | Ontario, Canada | 2004 | 21 | 15 |   |   |   |   |  | ✓ | ✓ |  |
| 1 | CD755 <sup>B</sup> | Ontario, Canada | 2004 | 21 | 15 |   |   |   |   |  | ✓ | ✓ |  |
| 1 | CD746 <sup>B</sup> | Ontario, Canada | 2004 | 21 | 15 |   |   |   |   |  | ✓ | ✓ |  |
| 1 | CD762 <sup>B</sup> | Ontario, Canada | 2004 | 21 | 15 |   |   |   |   |  | ✓ | ✓ |  |
| 1 | CD479 <sup>C</sup> | Ontario, Canada | 2005 | 21 | 15 | ✓ |   |   |   |  | ✓ | ✓ |  |
| 1 | CD493 <sup>C</sup> | Ontario, Canada | 2005 | 21 | 15 |   |   |   |   |  | ✓ | ✓ |  |
| 1 | CD504 <sup>C</sup> | Ontario, Canada | 2005 | 21 | 15 |   |   |   |   |  | ✓ | ✓ |  |
| 1 | CD515 <sup>C</sup> | Ontario, Canada | 2005 | 21 | 15 |   |   |   |   |  | ✓ | ✓ |  |
| 1 | CD523 <sup>C</sup> | Ontario, Canada | 2005 | 21 | 15 |   |   |   |   |  | ✓ | ✓ |  |
| 1 | CD527 <sup>C</sup> | Ontario, Canada | 2005 | 21 | 15 |   |   |   |   |  | ✓ | ✓ |  |
| 1 | CD528 <sup>C</sup> | Ontario, Canada | 2005 | 21 | 15 |   |   |   |   |  | ✓ | ✓ |  |
| 1 | CD529 <sup>C</sup> | Ontario, Canada | 2005 | 21 | 15 |   |   |   |   |  | ✓ | ✓ |  |
| 1 | CD531 <sup>C</sup> | Ontario, Canada | 2005 | 21 | 15 |   |   |   |   |  | ✓ | ✓ |  |
| 1 | CD578 <sup>E</sup> | Ontario, Canada | 2005 | 21 | 15 |   |   |   |   |  | ✓ | ✓ |  |
| 1 | CD524 <sup>C</sup> | Ontario, Canada | 2005 | 21 | 15 |   |   |   |   |  | ✓ | ✓ |  |
| 1 | CD514 <sup>C</sup> | Ontario, Canada | 2005 | 21 | 15 |   |   |   |   |  | ✓ | ✓ |  |
| 1 | S- 017.15          | Kuwait          | 2001 | 22 | 15 |   |   | ✓ | ✓ |  | ✓ | ✓ |  |
| 1 | S- 017.16          | Kuwait          | 2001 | 22 | 15 |   |   | ✓ | ✓ |  | ✓ | ✓ |  |
| 1 | DS 1383            | Singapore       | 2003 | 23 | 16 |   |   | ✓ | ✓ |  | ✓ | ✓ |  |
| 1 | SI 032             | Singapore       | 2008 | 23 | 16 |   |   | ✓ | ✓ |  | ✓ | ✓ |  |
| 1 | MOH207             | Ontario, Canada | 2003 | 24 | 16 | ✓ |   |   |   |  | ✓ | ✓ |  |
| 1 | MRL 270            | Ontario, Canada | 2006 | 24 | 16 |   | ✓ |   |   |  | ✓ | ✓ |  |
| 1 | MRL 102            | Ohio, USA       | 2006 | 24 | 16 | ✓ | ✓ |   |   |  | ✓ | ✓ |  |
| 1 | 09-275             | Korea           | 2009 | 25 | 16 | ✓ | ✓ | ✓ | ✓ |  | ✓ | ✓ |  |
| 1 | BG 181             | Bulgaria        | 2009 | 25 | 16 | ✓ | ✓ | ✓ | ✓ |  | ✓ | ✓ |  |
| 1 | GR 0108            | Greece          | 2009 | 25 | 16 |   | ✓ | ✓ | ✓ |  | ✓ | ✓ |  |
| 1 | S- 017.43          | Hong Kong       | 2011 | 25 | 16 | ✓ | ✓ | ✓ | ✓ |  | ✓ | ✓ |  |
| 1 | S- 017.75          | Coventry, UK    | 2011 | 25 | 16 | ✓ | ✓ | ✓ | ✓ |  | ✓ | ✓ |  |
| 1 | S- 017.40          | Hong Kong       | 2011 | 25 | 16 | ✓ | ✓ | ✓ | ✓ |  | ✓ | ✓ |  |
| 1 | SCH5842529         | South Africa    | 2012 | 25 | 16 | ✓ | ✓ | ✓ | ✓ |  | ✓ | ✓ |  |
| 1 | SI 064             | Singapore       | 2012 | 25 | 16 |   | ✓ | ✓ | ✓ |  | ✓ | ✓ |  |

|   |           |                     |      |    |    |   |   |   |   |  |   |   |   |
|---|-----------|---------------------|------|----|----|---|---|---|---|--|---|---|---|
| 1 | WX-36     | London, UK          | 2012 | 25 | 16 | ✓ | ✓ | ✓ | ✓ |  | ✓ | ✓ |   |
| 1 | S- 017.79 | Nottinghamshire, UK | 2012 | 25 | 16 | ✓ | ✓ | ✓ | ✓ |  | ✓ | ✓ |   |
| 1 | 02-210    | Korea               | 2002 | 27 | 17 |   | ✓ | ✓ | ✓ |  | ✓ | ✓ |   |
| 1 | SI 1101   | Slovenia            | 2009 | 28 | 17 | ✓ | ✓ | ✓ | ✓ |  | ✓ | ✓ |   |
| 1 | S- 017.55 | Nottinghamshire, UK | 2009 | 28 | 17 | ✓ | ✓ | ✓ | ✓ |  | ✓ | ✓ |   |
| 1 | S- 017.91 | China               | 2009 | 28 | 17 |   | ✓ | ✓ | ✓ |  | ✓ | ✓ |   |
| 1 | S- 017.32 | Hong Kong           | 2010 | 28 | 17 | ✓ | ✓ | ✓ | ✓ |  | ✓ | ✓ |   |
| 1 | S- 017.33 | Hong Kong           | 2010 | 28 | 17 | ✓ | ✓ | ✓ | ✓ |  | ✓ | ✓ |   |
| 1 | WX-35     | London, UK          | 2011 | 28 | 17 | ✓ | ✓ | ✓ | ✓ |  | ✓ | ✓ |   |
| 1 | WA 1514   | Australia           | 2012 | 29 | 17 | ✓ | ✓ | ✓ | ✓ |  | ✓ | ✓ |   |
| 1 | MRL 3836  | Illinois, USA       | 2009 | 30 | 17 | ✓ | ✓ |   |   |  | ✓ | ✓ |   |
| 1 | S- 017.77 | Coventry, UK        | 2012 | 31 | 18 | ✓ | ✓ | ✓ | ✓ |  | ✓ | ✓ |   |
| 1 | S- 017.92 | China               | 2009 | 32 | 18 | ✓ | ✓ | ✓ | ✓ |  | ✓ | ✓ |   |
| 1 | CZ 1201   | Czech Republic      | 2009 | 32 | 18 |   | ✓ | ✓ | ✓ |  | ✓ | ✓ |   |
| 1 | 675       | Romania             | 2009 | 32 | 18 |   | ✓ | ✓ | ✓ |  | ✓ | ✓ |   |
| 1 | S- 017.20 | Poland              | 2003 | 35 | 18 |   |   |   |   |  |   | ✓ |   |
| 1 | S- 017.1  | Argentina           | 2001 | 37 | 18 |   |   | ✓ | ✓ |  | ✓ | ✓ |   |
| 1 | S- 017.2  | Argentina           | 2001 | 37 | 18 |   | ✓ | ✓ | ✓ |  | ✓ | ✓ |   |
| 1 | S- 017.3  | Argentina           | 2001 | 37 | 18 |   |   | ✓ | ✓ |  | ✓ | ✓ |   |
| 1 | NP-25     | London, UK          | 2008 | 39 | 19 | ✓ |   | ✓ | ✓ |  | ✓ | ✓ |   |
| 1 | ES 531    | Australia           | 2011 | 39 | 19 | ✓ | ✓ | ✓ | ✓ |  | ✓ | ✓ |   |
| 1 | S- 017.35 | Hong Kong           | 2010 | 40 | 19 | ✓ | ✓ | ✓ | ✓ |  | ✓ | ✓ |   |
| 1 | S- 017.37 | Hong Kong           | 2010 | 40 | 19 | ✓ | ✓ | ✓ | ✓ |  | ✓ | ✓ |   |
| 1 | S- 017.38 | Hong Kong           | 2010 | 40 | 19 | ✓ | ✓ | ✓ | ✓ |  | ✓ | ✓ |   |
| 1 | ES 580    | Australia           | 2012 | 41 | 19 | ✓ | ✓ | ✓ | ✓ |  | ✓ | ✓ |   |
| 1 | ES 720    | Australia           | 2012 | 41 | 19 | ✓ | ✓ | ✓ | ✓ |  | ✓ | ✓ |   |
| 1 | 12H001405 | London, UK          | 2013 | 41 | 19 | ✓ | ✓ | ✓ | ✓ |  | ✓ | ✓ |   |
| 1 | 6797      | Argentina           | 2011 | 43 | 19 |   |   | ✓ | ✓ |  | ✓ | ✓ |   |
| 1 | PL 1204   | Poland              | 2009 | 49 | 20 |   |   |   |   |  |   | ✓ | ✓ |
| 1 | 01-116    | Korea               | 2001 | 56 | 20 |   |   | ✓ | ✓ |  |   | ✓ |   |
| 1 | S- 017.19 | Poland              | 2003 | 57 | 21 |   |   |   |   |  | ✓ | ✓ |   |
| 1 | 6050595   | The Netherlands     | 2006 | 57 | 21 |   |   |   |   |  | ✓ | ✓ |   |
| 1 | 7036732   | The Netherlands     | 2007 | 57 | 21 |   |   |   |   |  | ✓ | ✓ |   |

|   |           |                     |      |    |    |   |   |   |   |  |   |   |   |
|---|-----------|---------------------|------|----|----|---|---|---|---|--|---|---|---|
| 1 | S- 017.58 | Nottinghamshire, UK | 2010 | 62 | 22 |   |   |   | ✓ |  | ✓ | ✓ |   |
| 1 | 03-182    | Korea               | 2003 | 63 | 22 | ✓ | ✓ | ✓ | ✓ |  | ✓ | ✓ |   |
| 1 | 06-378    | Korea               | 2006 | 64 | 22 | ✓ |   | ✓ | ✓ |  | ✓ | ✓ |   |
| 1 | 07-613    | Korea               | 2007 | 64 | 22 |   | ✓ | ✓ | ✓ |  | ✓ | ✓ |   |
| 1 | 0 9-02    | Korea               | 2009 | 64 | 22 | ✓ |   | ✓ | ✓ |  | ✓ | ✓ |   |
| 1 | 08-191    | Korea               | 2008 | 65 | 22 | ✓ | ✓ | ✓ | ✓ |  | ✓ | ✓ |   |
| 1 | 06-472    | Korea               | 2006 | 66 | 23 | ✓ |   | ✓ | ✓ |  | ✓ | ✓ | ✓ |
| 1 | 07-527    | Korea               | 2007 | 66 | 23 | ✓ |   | ✓ | ✓ |  | ✓ | ✓ | ✓ |
| 1 | 04-247    | Korea               | 2004 | 67 | 23 |   | ✓ | ✓ | ✓ |  | ✓ | ✓ |   |
| 1 | 05-269    | Korea               | 2005 | 67 | 23 |   |   | ✓ | ✓ |  | ✓ | ✓ |   |
| 1 | 0 8-26    | Korea               | 2008 | 67 | 23 |   |   | ✓ | ✓ |  | ✓ | ✓ |   |
| 1 | S- 017.48 | Coventry, UK        | 2008 | 68 | 23 | ✓ |   | ✓ | ✓ |  | ✓ | ✓ |   |
| 1 | S- 017.47 | Coventry, UK        | 2008 | 68 | 23 |   |   | ✓ | ✓ |  | ✓ | ✓ |   |
| 1 | S- 017.60 | Nottinghamshire, UK | 2010 | 68 | 23 |   |   | ✓ | ✓ |  | ✓ | ✓ |   |
| 1 | S- 017.62 | Nottinghamshire, UK | 2010 | 68 | 23 |   |   | ✓ | ✓ |  | ✓ | ✓ |   |
| 1 | S- 017.68 | Coventry, UK        | 2011 | 68 | 23 |   |   | ✓ | ✓ |  | ✓ | ✓ |   |
| 1 | S- 017.69 | Coventry, UK        | 2011 | 68 | 23 |   |   | ✓ | ✓ |  | ✓ | ✓ |   |
| 1 | S- 017.46 | Coventry, UK        | 2008 | 72 | 24 |   |   | ✓ | ✓ |  | ✓ | ✓ |   |
| 1 | S- 017.50 | Coventry, UK        | 2008 | 72 | 24 |   |   | ✓ | ✓ |  | ✓ | ✓ |   |
| 1 | S- 017.49 | Coventry, UK        | 2008 | 72 | 24 |   |   | ✓ | ✓ |  | ✓ | ✓ |   |
| 1 | S- 017.51 | Coventry, UK        | 2008 | 72 | 24 |   |   | ✓ | ✓ |  | ✓ | ✓ |   |
| 1 | S- 017.52 | Coventry, UK        | 2008 | 72 | 24 |   |   | ✓ | ✓ |  | ✓ | ✓ |   |
| 1 | 05-302    | Korea               | 2005 | 75 | 25 |   | ✓ | ✓ | ✓ |  | ✓ | ✓ |   |
| 1 | S- 017.72 | Walsall, UK         | 2011 | 79 | 27 |   |   |   | ✓ |  | ✓ | ✓ |   |
| 1 | S- 017.73 | Walsall, UK         | 2011 | 79 | 27 |   |   |   | ✓ |  | ✓ | ✓ |   |
| 1 | S- 017.64 | Walsall, UK         | 2011 | 79 | 27 |   |   |   | ✓ |  | ✓ | ✓ |   |
| 1 | S- 017.65 | Walsall, UK         | 2011 | 79 | 27 |   |   |   | ✓ |  | ✓ | ✓ |   |
| 1 | S- 017.66 | Walsall, UK         | 2011 | 79 | 27 |   |   |   | ✓ |  | ✓ | ✓ |   |
| 1 | S- 017.90 | China               | 2009 | 82 | 30 |   | ✓ | ✓ | ✓ |  | ✓ | ✓ |   |
| 1 | S- 017.57 | Nottinghamshire, UK | 2009 | 83 | 31 |   |   | ✓ | ✓ |  | ✓ | ✓ |   |
| 1 | S- 017.59 | Nottinghamshire, UK | 2010 | 83 | 31 |   |   | ✓ | ✓ |  | ✓ | ✓ |   |
| 1 | S- 017.70 | Lincolnshire, UK    | 2011 | 84 | 31 | ✓ | ✓ | ✓ | ✓ |  | ✓ | ✓ |   |
| 1 | S- 017.86 | China               | 2009 | 94 | 34 |   | ✓ | ✓ | ✓ |  | ✓ | ✓ |   |

|   |           |                   |      |    |    |   |   |   |   |  |   |   |   |
|---|-----------|-------------------|------|----|----|---|---|---|---|--|---|---|---|
| 1 | S- 017.87 | China             | 2009 | 94 | 34 |   |   | ✓ | ✓ |  | ✓ | ✓ |   |
| 1 | S- 017.95 | China             | 2010 | 94 | 34 |   |   | ✓ | ✓ |  | ✓ | ✓ |   |
| 1 | S- 017.88 | China             | 2009 | 95 | 35 |   |   | ✓ | ✓ |  | ✓ | ✓ |   |
| 1 | S- 017.89 | China             | 2009 | 95 | 35 |   |   | ✓ | ✓ |  | ✓ | ✓ |   |
| 1 | S- 017.93 | China             | 2009 | 95 | 35 |   | ✓ | ✓ | ✓ |  | ✓ | ✓ |   |
| 1 | S- 017.94 | China             | 2009 | 95 | 35 |   |   | ✓ | ✓ |  | ✓ | ✓ |   |
| 2 | 5992      | Illinois, USA     | 1996 | 26 | 17 | ✓ |   |   |   |  |   | ✓ |   |
| 2 | S- 017.80 | Wolverhampton, UK | 2012 | 33 | 18 | ✓ | ✓ |   |   |  |   | ✓ |   |
| 2 | S- 017.78 | Wolverhampton, UK | 2012 | 33 | 18 | ✓ | ✓ |   |   |  |   | ✓ |   |
| 2 | S- 017.36 | Hong Kong         | 2010 | 34 | 18 | ✓ | ✓ |   |   |  |   | ✓ |   |
| 2 | 95-24     | Korea             | 1995 | 36 | 18 | ✓ | ✓ |   |   |  |   | ✓ |   |
| 2 | 95-25     | Korea             | 1995 | 36 | 18 | ✓ | ✓ |   |   |  |   | ✓ |   |
| 2 | S- 017.14 | Japan             | 1999 | 38 | 19 | ✓ |   |   |   |  |   | ✓ |   |
| 2 | T-14      | Taiwan            | 2011 | 38 | 19 | ✓ |   |   |   |  |   | ✓ |   |
| 2 | MRL 991   | California, USA   | 2007 | 42 | 19 | ✓ | ✓ |   |   |  |   | ✓ |   |
| 2 | QM-34     | London, UK        | 2011 | 42 | 19 | ✓ |   |   |   |  |   | ✓ |   |
| 2 | S- 017.11 | Fife, UK          | 2002 | 44 | 19 | ✓ | ✓ |   |   |  |   | ✓ |   |
| 2 | S- 017.21 | Poland            | 2003 | 44 | 19 | ✓ | ✓ |   |   |  |   | ✓ |   |
| 2 | MRL 738   | Washington, USA   | 2007 | 44 | 19 | ✓ | ✓ |   |   |  |   | ✓ |   |
| 2 | S- 017.30 | Hong Kong         | 2010 | 44 | 19 |   | ✓ |   |   |  |   | ✓ |   |
| 2 | S- 017.31 | Hong Kong         | 2010 | 44 | 19 | ✓ | ✓ |   |   |  |   | ✓ |   |
| 2 | S- 017.41 | Hong Kong         | 2011 | 44 | 19 |   | ✓ |   |   |  |   | ✓ |   |
| 2 | S- 017.45 | Hong Kong         | 2011 | 44 | 19 | ✓ | ✓ |   |   |  |   | ✓ |   |
| 2 | S- 017.44 | Hong Kong         | 2011 | 44 | 19 | ✓ | ✓ |   |   |  |   | ✓ |   |
| 2 | WA 1196   | Australia         | 2012 | 44 | 19 | ✓ | ✓ |   |   |  |   | ✓ |   |
| 2 | S- 017.4  | Aylesbury, UK     | 2005 | 45 | 19 | ✓ |   |   |   |  |   | ✓ | ✓ |
| 2 | 00-108    | Korea             | 2000 | 46 | 19 | ✓ |   |   |   |  |   | ✓ |   |
| 2 | 5572      | Minnesota, USA    | 1992 | 47 | 20 | ✓ |   | ✓ |   |  | ✓ | ✓ |   |
| 2 | 6084529   | The Netherlands   | 2006 | 48 | 20 |   |   |   |   |  |   | ✓ |   |
| 2 | SI 010    | Singapore         | 2008 | 48 | 20 | ✓ |   |   |   |  |   | ✓ |   |
| 2 | S- 017.56 | Birmingham, UK    | 2009 | 50 | 20 | ✓ |   |   |   |  |   | ✓ |   |
| 2 | 7038446   | The Netherlands   | 2007 | 51 | 20 | ✓ |   |   |   |  | ✓ | ✓ |   |
| 2 | 7047343   | The Netherlands   | 2007 | 51 | 20 | ✓ | ✓ |   |   |  | ✓ | ✓ |   |

|   |            |                    |      |    |    |   |   |   |   |   |   |   |   |
|---|------------|--------------------|------|----|----|---|---|---|---|---|---|---|---|
| 2 | WA 1428    | Australia          | 2012 | 52 | 20 | ✓ |   |   |   |   |   | ✓ |   |
| 2 | SI 004     | Singapore          | 2008 | 53 | 20 | ✓ | ✓ |   |   |   |   | ✓ |   |
| 2 | S- 017.67  | Coventry, UK       | 2011 | 54 | 20 | ✓ | ✓ |   |   |   |   | ✓ |   |
| 2 | S- 017.71  | Staffordshire, UK  | 2011 | 55 | 20 | ✓ | ✓ |   |   |   |   | ✓ | ✓ |
| 2 | S- 017.81  | Walsall, UK        | 2012 | 55 | 20 | ✓ |   |   |   |   |   | ✓ | ✓ |
| 2 | SI 007     | Singapore          | 2008 | 58 | 21 |   |   | ✓ | ✓ |   |   | ✓ |   |
| 2 | S- 017.76  | Coventry, UK       | 2012 | 59 | 21 | ✓ | ✓ |   |   |   |   | ✓ | ✓ |
| 2 | DS 21      | Singapore          | 2003 | 60 | 21 | ✓ | ✓ |   |   |   |   | ✓ |   |
| 2 | I 6        | Indonesia          | 2011 | 61 | 22 | ✓ | ✓ | ✓ | ✓ |   | ✓ | ✓ |   |
| 2 | 9029054    | The Netherlands    | 2009 | 69 | 23 |   | ✓ | ✓ | ✓ |   | ✓ | ✓ |   |
| 2 | S- 017.7   | Dorchester, UK     | 1996 | 70 | 23 | ✓ |   |   |   |   |   | ✓ |   |
| 2 | NM-27      | Middlesex, UK      | 2005 | 71 | 24 | ✓ |   |   |   |   | ✓ | ✓ |   |
| 2 | S- 017.6   | Dorchester, UK     | 1996 | 73 | 25 | ✓ |   |   |   |   | ✓ | ✓ |   |
| 2 | 4241       | Minnesota, USA     | 1990 | 74 | 25 | ✓ |   |   |   |   |   | ✓ |   |
| 2 | S- 017.53  | Worcestershire, UK | 2009 | 74 | 25 | ✓ |   |   |   |   |   | ✓ |   |
| 2 | SI 047     | Singapore          | 2012 | 74 | 25 | ✓ | ✓ |   |   |   |   | ✓ |   |
| 2 | SI 099     | Singapore          | 2012 | 74 | 25 | ✓ | ✓ |   |   |   |   | ✓ |   |
| 2 | B-26       | London, UK         | 2009 | 76 | 26 | ✓ |   |   |   |   | ✓ | ✓ |   |
| 2 | S- 017.27  | Wrexham, UK        | 1996 | 77 | 26 | ✓ |   | ✓ |   | ✓ |   | ✓ | ✓ |
| 2 | S- 017.28  | Wrexham, UK        | 1996 | 77 | 26 | ✓ |   | ✓ |   | ✓ |   | ✓ | ✓ |
| 2 | S- 017.29  | Wrexham, UK        | 1996 | 77 | 26 | ✓ |   | ✓ |   | ✓ |   | ✓ | ✓ |
| 2 | T-79       | Taiwan             | 2011 | 78 | 27 |   | ✓ | ✓ | ✓ |   | ✓ | ✓ |   |
| 2 | T-16       | Taiwan             | 2011 | 78 | 27 |   | ✓ | ✓ | ✓ |   | ✓ | ✓ |   |
| 2 | SV04-6     | Dublin, Ireland    | 2004 | 80 | 28 | ✓ |   |   |   |   | ✓ | ✓ |   |
| 2 | SV05-3     | Dublin, Ireland    | 2005 | 80 | 28 | ✓ |   |   |   |   | ✓ | ✓ |   |
| 2 | SV05-25    | Dublin, Ireland    | 2005 | 80 | 28 | ✓ |   |   |   |   | ✓ | ✓ |   |
| 2 | SV04-10    | Dublin, Ireland    | 2004 | 81 | 30 | ✓ |   |   |   |   | ✓ | ✓ |   |
| 2 | SV04-18    | Dublin, Ireland    | 2004 | 81 | 30 | ✓ |   |   |   |   | ✓ | ✓ |   |
| 2 | SV04-19    | Dublin, Ireland    | 2004 | 81 | 30 | ✓ |   |   |   |   | ✓ | ✓ |   |
| 2 | SCH6148880 | South Africa       | 2012 | 85 | 31 |   | ✓ | ✓ | ✓ |   | ✓ | ✓ |   |
| 2 | UHL-4      | London, UK         | 2009 | 86 | 31 | ✓ | ✓ |   |   |   | ✓ | ✓ |   |
| 2 | SCH5806999 | South Africa       | 2012 | 87 | 32 |   |   | ✓ | ✓ |   | ✓ | ✓ |   |
| 2 | SCH6098043 | South Africa       | 2012 | 87 | 32 |   |   | ✓ | ✓ |   | ✓ | ✓ |   |

|   |                      |                 |      |     |    |   |   |   |   |  |   |   |   |
|---|----------------------|-----------------|------|-----|----|---|---|---|---|--|---|---|---|
| 2 | SCH5824693           | South Africa    | 2012 | 88  | 32 |   |   | ✓ | ✓ |  |   | ✓ | ✓ |
| 2 | SCH5845556           | South Africa    | 2012 | 88  | 32 |   |   | ✓ | ✓ |  |   | ✓ | ✓ |
| 2 | MRL 985              | California, USA | 2007 | 89  | 32 | ✓ |   |   |   |  |   | ✓ |   |
| 2 | UHL-1                | London, UK      | 2005 | 90  | 32 | ✓ | ✓ |   |   |  | ✓ | ✓ |   |
| 2 | UHL-6                | London, UK      | 2009 | 90  | 32 | ✓ | ✓ |   |   |  | ✓ | ✓ |   |
| 2 | UHL-8                | London, UK      | 2009 | 90  | 32 | ✓ | ✓ |   |   |  | ✓ | ✓ |   |
| 2 | UHL-5                | London, UK      | 2009 | 90  | 32 | ✓ | ✓ |   |   |  | ✓ | ✓ |   |
| 2 | UHL-7                | London, UK      | 2009 | 90  | 32 | ✓ | ✓ |   |   |  | ✓ | ✓ |   |
| 2 | UHL-2                | London, UK      | 2009 | 90  | 32 | ✓ | ✓ |   |   |  | ✓ | ✓ |   |
| 2 | UHL-3                | London, UK      | 2009 | 90  | 32 | ✓ | ✓ |   |   |  | ✓ | ✓ |   |
| 2 | UHL-9                | London, UK      | 2009 | 90  | 32 | ✓ | ✓ |   |   |  | ✓ | ✓ |   |
| 2 | UHL-12               | London, UK      | 2010 | 90  | 32 |   |   |   |   |  | ✓ | ✓ |   |
| 2 | UHL-10               | London, UK      | 2010 | 90  | 32 | ✓ | ✓ |   |   |  | ✓ | ✓ |   |
| 2 | UHL-11               | London, UK      | 2010 | 90  | 32 | ✓ | ✓ |   |   |  | ✓ | ✓ |   |
| 2 | UHL-13               | London, UK      | 2010 | 90  | 32 | ✓ |   |   |   |  | ✓ | ✓ |   |
| 2 | UHL-14               | London, UK      | 2010 | 90  | 32 | ✓ |   |   |   |  | ✓ | ✓ |   |
| 2 | UHL-22               | London, UK      | 2010 | 90  | 32 | ✓ | ✓ |   |   |  | ✓ | ✓ |   |
| 2 | SI 006               | Singapore       | 2008 | 91  | 33 | ✓ | ✓ |   |   |  |   | ✓ |   |
| 2 | CDP08WTH7            | Liverpool, UK   | 2010 | 91  | 33 | ✓ |   |   |   |  |   | ✓ |   |
| 2 | UHL-15               | London, UK      | 2010 | 92  | 33 | ✓ | ✓ |   |   |  | ✓ | ✓ |   |
| 2 | UHL-16               | London, UK      | 2010 | 92  | 33 | ✓ | ✓ |   |   |  | ✓ | ✓ |   |
| 2 | UHL-17               | London, UK      | 2010 | 92  | 33 | ✓ | ✓ |   |   |  | ✓ | ✓ |   |
| 2 | UHL-21               | London, UK      | 2010 | 92  | 33 | ✓ | ✓ |   |   |  | ✓ | ✓ |   |
| 2 | UHL-23               | London, UK      | 2011 | 92  | 33 | ✓ | ✓ |   |   |  | ✓ | ✓ |   |
| 2 | UHL-19 <sup>HW</sup> | London, UK      | 2010 | 93  | 34 | ✓ | ✓ |   |   |  | ✓ | ✓ |   |
| 2 | UHL-21 <sup>HW</sup> | London, UK      | 2010 | 93  | 34 | ✓ | ✓ |   |   |  | ✓ | ✓ |   |
| 2 | UHL-18               | London, UK      | 2010 | 93  | 34 | ✓ | ✓ |   |   |  | ✓ | ✓ |   |
| 2 | MRL 2923             | Colorado, USA   | 2008 | 96  | 36 | ✓ | ✓ |   |   |  |   | ✓ |   |
| 2 | 5733                 | Illinois, USA   | 1995 | 97  | 37 | ✓ | ✓ |   |   |  | ✓ | ✓ |   |
| 2 | 8070899              | The Netherlands | 2008 | 98  | 37 | ✓ | ✓ |   |   |  |   | ✓ |   |
| 2 | CX-32                | London, UK      | 2011 | 98  | 37 | ✓ |   |   |   |  |   | ✓ |   |
| 2 | MRL 2259             | California, USA | 2008 | 99  | 38 | ✓ |   |   |   |  |   | ✓ |   |
| 2 | 4092                 | Minnesota, USA  | 1990 | 100 | 38 | ✓ | ✓ |   |   |  | ✓ | ✓ |   |



|   |            |                      |      |     |    |   |   |   |   |  |   |   |  |
|---|------------|----------------------|------|-----|----|---|---|---|---|--|---|---|--|
| 2 | 4139       | Minnesota, USA       | 1990 | 100 | 38 | ✓ | ✓ |   |   |  | ✓ | ✓ |  |
| 2 | H-219      | Illinois, USA        | 2006 | 100 | 38 | ✓ | ✓ |   |   |  | ✓ | ✓ |  |
| 2 | 12H400159  | London, UK           | 2013 | 101 | 39 | ✓ | ✓ |   |   |  | ✓ | ✓ |  |
| 2 | 5264       | Minnesota, USA       | 1992 | 102 | 39 | ✓ | ✓ |   |   |  | ✓ | ✓ |  |
| 2 | 5265       | Minnesota, USA       | 1992 | 102 | 39 | ✓ | ✓ |   |   |  | ✓ | ✓ |  |
| 2 | 5340       | Minnesota, USA       | 1993 | 102 | 39 | ✓ | ✓ |   |   |  | ✓ | ✓ |  |
| 2 | S- 017.84  | Northamptonshire, UK | 2012 | 103 | 39 | ✓ |   |   |   |  | ✓ | ✓ |  |
| 2 | S- 017.82  | Northamptonshire, UK | 2012 | 103 | 39 | ✓ |   |   |   |  | ✓ | ✓ |  |
| 2 | S- 017.83  | Northamptonshire, UK | 2012 | 103 | 39 | ✓ |   |   |   |  | ✓ | ✓ |  |
| 2 | GOSH-28    | London, UK           | 2010 | 104 | 41 | ✓ |   |   |   |  |   | ✓ |  |
| 2 | GOSH-29    | London, UK           | 2010 | 105 | 47 | ✓ |   |   |   |  |   | ✓ |  |
| 2 | GOSH-30    | London, UK           | 2010 | 105 | 47 | ✓ |   |   |   |  |   | ✓ |  |
| 2 | RF-31      | London, UK           | 2010 | 105 | 47 | ✓ | ✓ |   |   |  |   | ✓ |  |
| 2 | S- 017.61  | Birmingham, UK       | 2010 | 106 | 48 | ✓ | ✓ |   |   |  |   | ✓ |  |
| 2 | S- 017.74  | Walsall, UK          | 2011 | 106 | 48 | ✓ | ✓ |   |   |  |   | ✓ |  |
| 2 | S- 017.85  | Northamptonshire, UK | 2012 | 106 | 48 | ✓ | ✓ |   |   |  |   | ✓ |  |
| 2 | WA 0908    | Australia            | 2012 | 106 | 48 | ✓ | ✓ |   |   |  |   | ✓ |  |
| 2 | GOSH-37    | London, UK           | 2013 | 107 | 49 | ✓ |   |   |   |  |   | ✓ |  |
| 2 | SCH5865760 | South Africa         | 2012 | 108 | 51 |   |   | ✓ | ✓ |  |   | ✓ |  |
| 2 | SCH5864722 | South Africa         | 2012 | 109 | 52 |   | ✓ | ✓ | ✓ |  | ✓ | ✓ |  |
| 2 | SCH6163235 | South Africa         | 2012 | 109 | 52 |   |   | ✓ | ✓ |  | ✓ | ✓ |  |

\* Reference Residue/Amino Acid/ Alternative Residue
