# Supplementary material for: Comparative Genome Analysis and Global Phylogeny of the Toxin Variant Clostridium difficile PCR Ribotype 017 Reveals the Evolution of Two Independent Sublineages
Source: PubMed Central journal article supplement (PMC5328454; doi:10.1128/jcm.01296-16), 2017-02-22
Supplement: JCM.01296-16_zjm999095388s3.pdf [file JCM.01296-16_zjm999095388s3.pdf]

Supplementary Information 3: Details of the six deletions and their corresponding genes of interest and putative function.

| Deletion Site in M68 | Size (bps) | No. of isolates | Sub-Lineage | No. of CDS | Genes of Interest/Putative Function                                                                                                                                                                                                                                                                                                          |
|----------------------|------------|-----------------|-------------|------------|----------------------------------------------------------------------------------------------------------------------------------------------------------------------------------------------------------------------------------------------------------------------------------------------------------------------------------------------|
| 480308               | 27,982     | 67 (24.2%)      | SL1 and SL2 | 31         | DNA-directed RNA polymerase sigma-70 factor, sporulation initiation inhibitor, dimethyladenosine transferase (ermB), zeta toxin, antitoxin epsilon, omega transcriptional repressor, ABC transporter, ATP-binding protein, GntR-family transcriptional regulator, cell wall hydrolase, DNA-binding protein, collagen-binding surface protein |
| 2172459              | 27,985     | 8 (2.9%)        | SL1         | 18         | Aminotransferase, aminobenzoyl-glutamate transport protein, peptidase, transcriptional regulator, bacterial alpha-L-rhamnosidase, xylose transporter, AraC-family transcriptional regulator, ethanolamine/propanediol utilization protein, two-component sensor histidine kinase, two-component response regulator                           |
| 2210949              | 8,866      | 8 (2.9%)        | SL1         | 10         | Membrane protein, ABC transporter, anti-sigma factor, ECF family, RNA polymerase sigma factor, carbohydrate acetyl esterase/feruloyl esterase precursor, PadR family transcriptional regulator, AraC-family transcriptional regulator, site-specific recombinase                                                                             |
| 2527343              | 9,890      | 99 (35.7%)      | SL1 and SL2 | 7          | Acetyltransferase, bifunctional AAC/APH, aminoglycoside 6-adenylyltransferase                                                                                                                                                                                                                                                                |
| 2969461              | 16,713     | 5 (1.8%)        | SL1 and SL2 | 15         | RNA polymerase sigma-E factor, AIPR protein, teicoplanin resistance protein, beta-lactamase repressor, membrane protein, cell surface protein, lipoprotein                                                                                                                                                                                   |
| 3934113              | 22,222     | 28 (10.1%)      | SL2         | 15         | DNA-binding protein, translation elongation factor G, cell wall hydrolase, collagen-binding surface protein.                                                                                                                                                                                                                                 |
